# Supplementary material
Source: PubMed Central journal article supplement (PMC3422471)
Supplement: cdd201222x1.pdf [file cdd201222x1.pdf]

## Supplementary information

### Supplemental materials and methods

**Cell culture and reagents.** All NSCLC cell lines were purchased from ATCC. NCI-H661, NCI-H520 and NCI-H596 and were grown in RPMI 1640 medium (Invitrogen) supplemented with 10% foetal bovine serum, Hepes, NaPy, 100 U/ml penicillin/streptomycin and 2 mM glutamine. SK-MES-1 cells were grown in RPMI 1640 medium supplemented with 10% FBS, Neaa, NaPy, 100 U/ml penicillin/streptomycin and 2 mM glutamine. SW900 cells were grown in Leibovitz's L-15 medium supplemented with 10% FBS, 100 U/ml penicillin/streptomycin and 2 mM glutamine. HEK293-empty vector and HEK293-TLR3-HA cells (Invivogen) were grown in DMEM medium (Invitrogen Life Sciences) supplemented with 10% FBS and penicillin/streptomycin. Ha-Tag monoclonal antibody was from Invivogen. Synthetic TNFRI siRNA (SI00301945) was from Qiagen.

**Electron microscopy.** Cells were fixed by adding 4% glutaraldehyde in cell culture medium for 15 minutes at 4°C. Supernatants were collected and treated separately. Fixation was completed with 4% glutaraldehyde–0.2 M Na-cacodylate/HCl buffer at pH 7.4 for 30 minutes at 4°C. After fixation, cells were washed 3 times with a 0.2 M Na-cacodylate/HCl buffer at pH 7.4 and 0.4 M saccharose solution for 30 minutes. Samples were placed in 2% osmium tetroxide–0.3 M Na-cacodylate/HCl buffer at pH 7.4 for 45 minutes at 4°C, dehydrated in a graded series of ethyl alcohol and embedded in Epon resin. Ultrathin sections were cut with a RMX-MTL Ultramicrotome (Ventana), contrasted with methanolic uranyl acetate and lead citrate, and examined using a JEOL 1200 EX transmission electron microscope equipped with SIS MEGAVIEW II CCD camera (Olympus) and SIS AnalySIS software (Olympus).

**Size-exclusion chromatography.** NCI-H1703 cells were stimulated with 100 µg/ml poly(I:C) for 0,5 or 2 h, washed twice in cold phosphate-buffered saline, and lysed in CHAPS-containing lysis buffer (14 mM CHAPS, 150 mM NaCl, and 20 mM Tris-Hcl [pH 7.4], plus complete protease inhibitors). Lysates were loaded onto a Superdex-200 column previously equilibrated in CHAPS lysis buffer. Proteins were eluted at 800 µl/min. Fractions were maintained at 4°C and precipitated using TCA 5%.

**Luciferase reporter assay.** For stable generation of cell lines expressing the luciferase NF-κB and ISRE reporters, cells were transduced with luciferase NF-κB or ISRE reporter lentiviruses (SABiosciences) according to the manufacturer's recommendations, and transduced cells were selected with puromycin (2 µg/ml). NCI-H1703 and NCI-H292 cells stably expressing the luciferase NF-κB or ISRE reporter were seeded at 1.104 cells per well in 96-wells plates, cultured for 24h and then treated with Poly(I:C) for indicated times. Luciferase activity was measured with a luminometer (Tecan) by adding luciferin substrate (Steady-Glo luciferase assay, Promega) according to the manufacturer's recommendations.

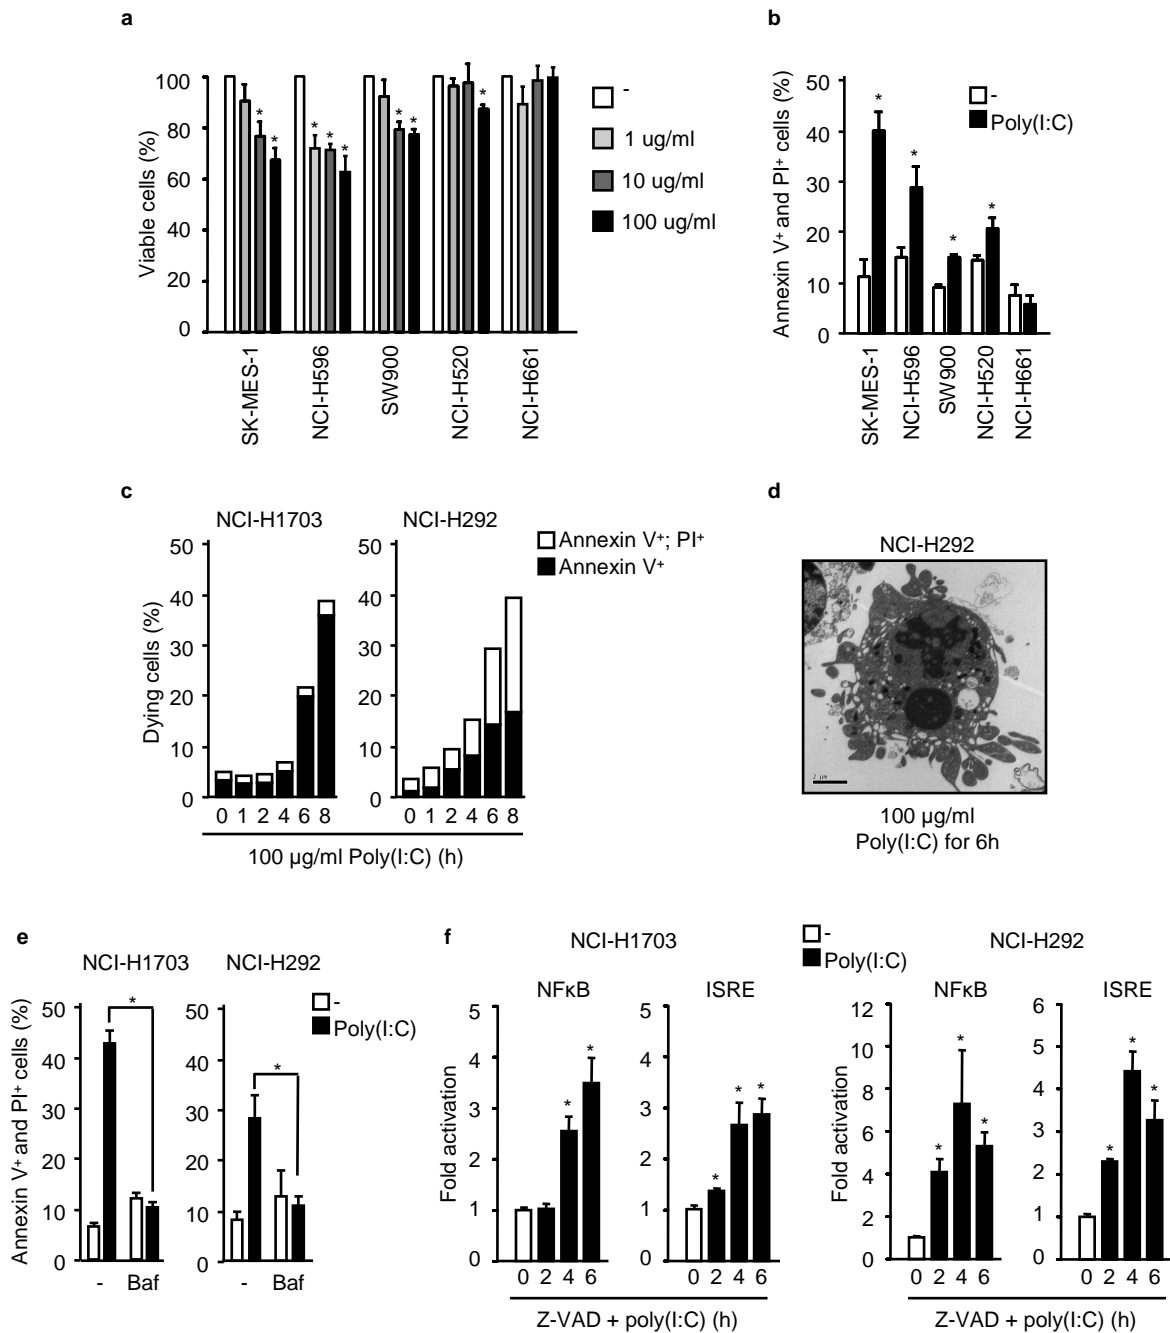

**Figure S1. Poly(I:C) decreases NSCLC cells survival and induces apoptosis through TLR3/TRIF pathway.**

(a) Various NSCLC cell lines were treated for 24h with Poly(I:C) at the indicated concentrations, and viable cells were numbered with MTS assay and expressed as % of untreated cells. \*,  $p < 0.05$  compared with untreated cells; error bars represent s.e.m. of three independent experiments performed in triplicate.

(b) Percentage of annexin V positive ( $^{+}$ ) and PI $^{+}$  NSCLC cells treated for 24h with 100 µg/ml Poly(I:C). \*,  $p < 0.05$  compared with untreated cells; error bars represent s.e.m. of three independent experiments.

(c) Percentage of annexin V $^{+}$  and PI $^{+}$  NCI-H1703 and NCI-H292 cells treated with 100 µg/ml Poly(I:C) for the indicated times. A representative experiment is shown.

(d) Representative picture taken by TEM of NCI-H292 cultured for 6h with 100 µg/ml Poly(I:C) showing typical features of apoptosis. Scale bar, 2 µm.

(e) Percentage of annexin V $^{+}$  and PI $^{+}$  NCI-H1703 and NCI-H292 cells incubated for 1h with 50 nM bafilomycin-A1 (Baf) and then exposed to 100 µg/ml Poly(I:C) for 24h. \*,  $p < 0.05$ ; error bars represent s.e.m. of three independent experiments.

(f) NCI-H1703 and NCI-H292 cells stably expressing luciferase NF-κB and ISRE reporters were treated 1h with 20 µM Z-VAD, exposed to 100 µg/ml Poly(I:C) for the indicated times, and the luciferase activity was measured. \*,  $p < 0.05$  compared with untreated cells; error bars represent s.e.m. of at least three independent experiments performed in triplicate.

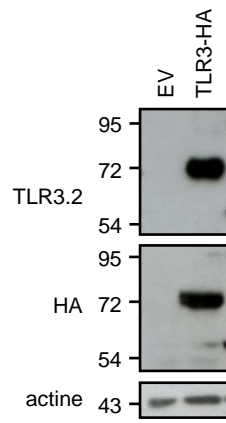

**Figure S2. TLR3.2 monoclonal antibody recognizes specifically human TLR3.**

HEK293-empty vector (EV) and HEK293-TLR3-HA (TLR3-HA) cells (Invivogen) were lysed and immunoblotted with our TLR3.2 mAb or with a HA-Tag mAb .

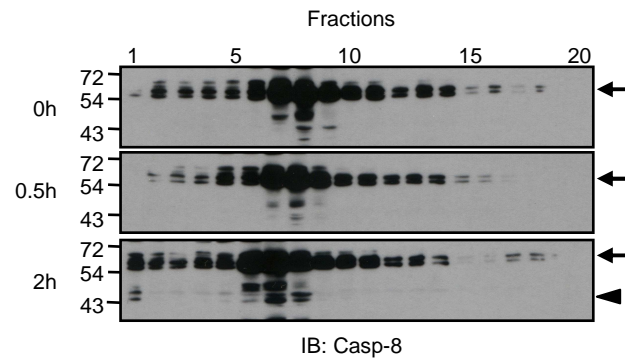

**Figure S3. Caspase-8 exhibits high apparent molecular weights after poly(I:C) stimulation.**

NCI-H1703 cells were stimulated with 100  $\mu\text{g/ml}$  poly(I:C) for the indicated times, and subsequently lysed in CHAPS lysis buffer. After fractionation on a S200 gel filtration column, caspase-8 was immunoblotted. Arrows correspond to full-length proteins, while arrowheads indicate cleaved fragments.

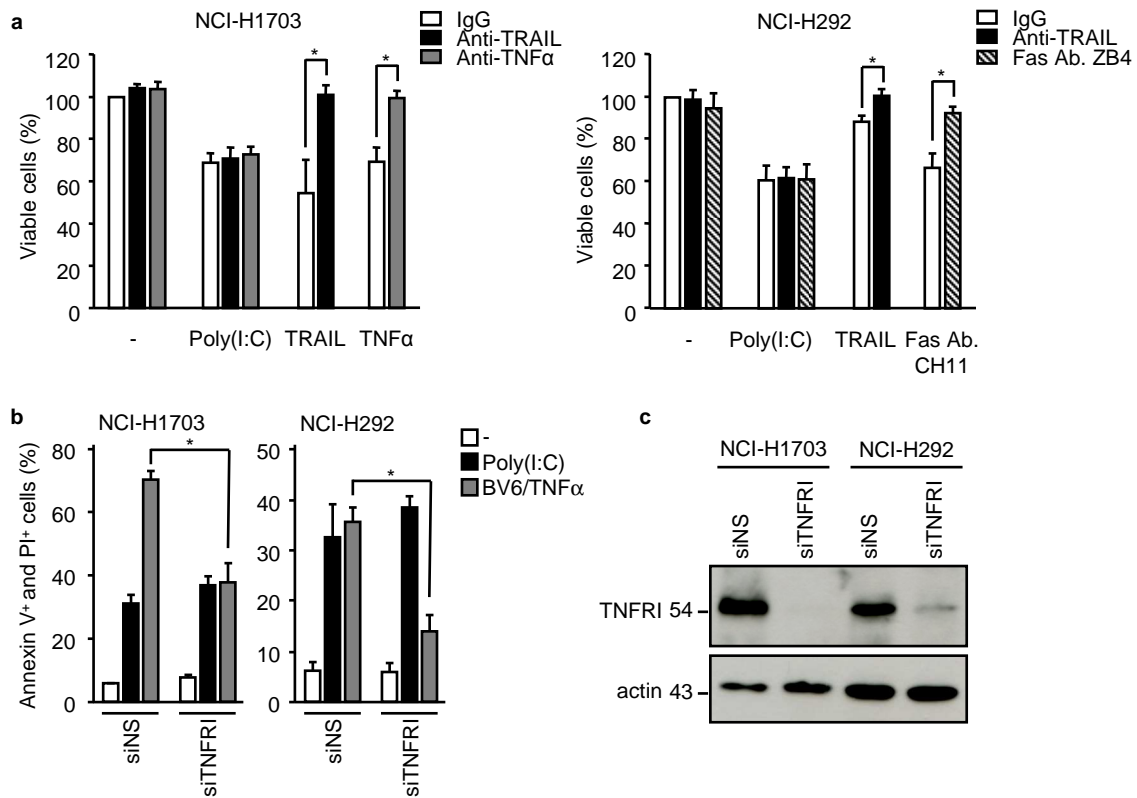

**Figure S4. TLR3 activation decreases cell viability independent of classical death receptors.**

(a) NCI-H1703 and NCI-H292 cells were pretreated 2 h with 10  $\mu$ g/ml control IgG or antibodies blocking TRAIL, TNF $\alpha$  or Fas (clone ZB4), and then exposed for 24 h to 100  $\mu$ g/ml Poly(I:C), 100 ng/ml TRAIL, 50 ng/ml TNF $\alpha$ , or 200 ng/ml anti-Fas antibody clone CH11. Viable cells were numbered with MTS assay and expressed as % of cells treated with control IgG. \*,  $p < 0.05$ ; error bars represent s.e.m. of three independent experiments performed in triplicate.

(b) NCI-H1703 and NCI-H292 cells were transfected with siRNA targeting TNFRI for 72h, exposed for 6h to 100  $\mu$ g/ml Poly(I:C) or the combination BV6/TNF $\alpha$ , and the percentage of annexin V+ and PI+ cells was measured. \*,  $p < 0.05$  compared with siNS-transfected cells treated with the combination BV6/TNF $\alpha$ ; error bars represent s.e.m. of three independent experiments.

(c) siNS or siTNFRI-transfected NCI-H1703 and NCI-H292 cells were lysed, and then immunoblotted as indicated.

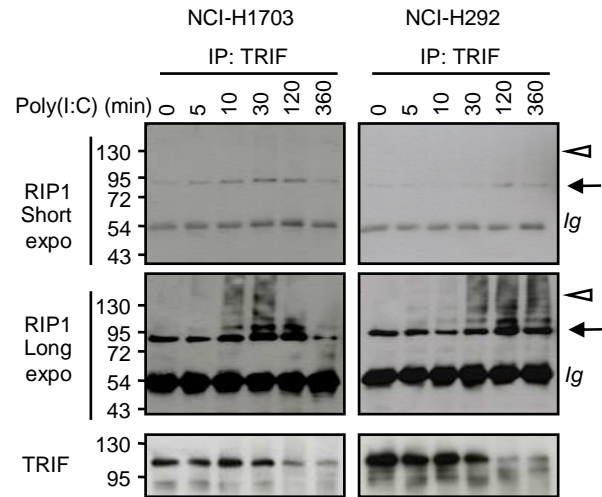

**Figure S5. RIP1 associates with TRIF after TLR3 activation.**

NCI-H1703 and NCI-H292 cells were stimulated with 100  $\mu\text{g/ml}$  Poly(I:C) for the indicated times, and TRIF immunoprecipitates (IP) were analyzed by immunoblot. Arrows and open arrowheads point to full length and modified RIP1, respectively. Ig, denotes immunoglobulin heavy chain.

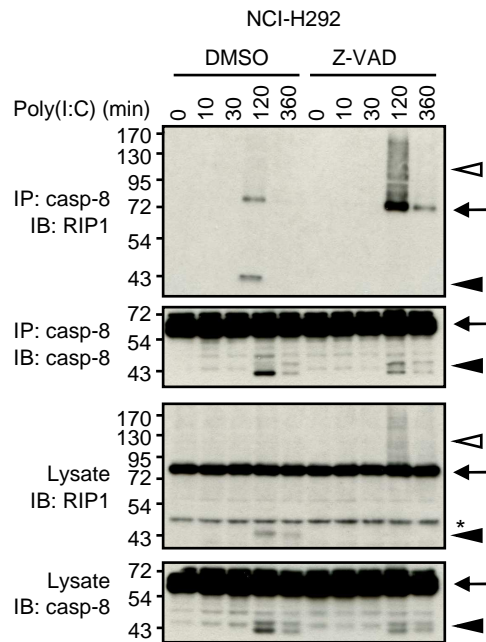

**Figure S6. RIP1 cleavage is inhibited by Z-VAD pretreatment**

NCI-H292 cells were incubated for 1h with 20  $\mu$ M caspases inhibitor Z-VAD and then treated with 100  $\mu$ g/ml Poly(I:C) for the indicated times. Caspase-8 immunoprecipitates were analysed by immunoblot. Arrows, filled arrowheads, and open arrowheads point to full length, cleaved, and modified proteins, respectively. \*, indicates nonspecific band.

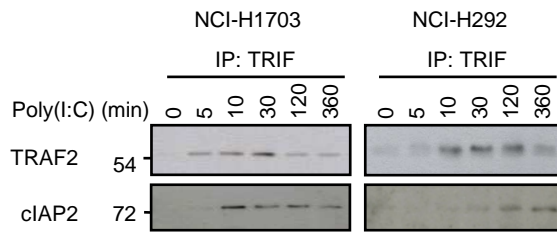

**Figure S7. The ubiquitin ligases TRAF2 and cIAP2 associate with TRIF after Poly(I:C) treatment.** NCI-H1703 and NCI-H292 cells were exposed to 100  $\mu\text{g/ml}$  Poly(I:C) for the indicated times, and TRIF immunoprecipitates (IP) and cell lysates were analyzed by immunoblot.



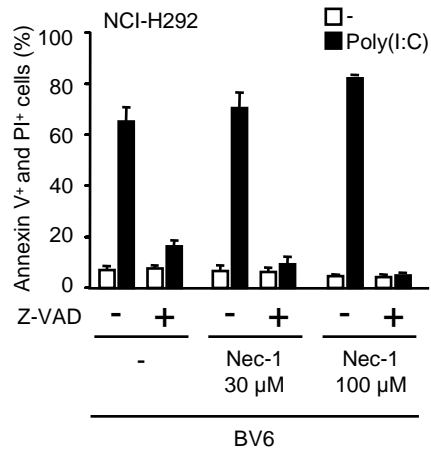

**Figure S8. Cell death induced by Poly(I:C) plus Smac mimetic BV6 is not inhibited by necrostatin-1**  
 Percentage of annexin V<sup>+</sup> and PI<sup>+</sup> NCI-H292 cells incubated for 1h with 5 μM Smac mimetic BV6 in presence or absence of 20 μM Z-VAD and/or necrostatin-1 at the indicated concentrations, and then treated with 100 μg/ml Poly(I:C) for 6h. Error bars represent s.e.m. of two independent experiments.
